# Supplementary material
Source: publisher figshare collection journal article supplement (https://gsapubs.figshare.com/ndownloader/files/39498340)
Supplement: Supplementary file 1 [file 39498340]

|  | GS basin | | | | FOZ & DEM basin | | | | Total | | | |
| --- | --- | --- | --- | --- | --- | --- | --- | --- | --- | --- | --- | --- |
| Time interval (Ma) | Vol.  (x105 km3) | uncert.  +/- (x105 km3) | Rate (x104 km3/Myr) | uncert.  +/- (x104 km3/Myr) | Vol.  (x105 km3) | uncert.  +/- (x105 km3) | Rate (x104 km3/Myr) | uncert.  +/- (x104 km3/Myr) | Vol.  (x105 km3) | uncert.  +/ (x105 km3) | Rate (x104 km3/Myr) | uncert.  +/- (x104 km3/Myr) |
| 0-6 | 3.46 | 0.68 | 6.92 | 1.36 | 9.56 | 1.60 | 19.11 | 3.20 | 13.02 | 2.52 | 26.04 | 5.05 |
| 6-23 | 0.55 | 0.22 | 0.31 | 0.12 | 1.59 | 1.16 | 0.88 | 0.65 | 2.14 | 2.10 | 1.19 | 1.17 |
| 23-66 | 0.76 | 0.24 | 0.18 | 0.05 | 2.46 | 0.68 | 0.57 | 0.16 | 3.21 | 1.12 | 0.75 | 0.26 |
| 66-83 | 1.58 | 0.24 | 1.00 | 0.15 | 6.44 | 0.72 | 4.02 | 0.45 | 8.02 | 1.19 | 5.01 | 0.74 |
| 83-103 | 2.43 | 0.40 | 1.15 | 0.19 | 3.48 | 0.67 | 1.66 | 0.32 | 5.91 | 0.95 | 2.81 | 0.45 |
| 103-130 | 2.67 | 0.60 | 1.00 | 0.22 | 2.42 | 0.89 | 0.90 | 0.33 | 5.09 | 1.18 | 1.88 | 0.44 |
| 130-165 | 0.21 | 0.22 | 0.06 | 0.06 | - | - | - | - | 0.21 | 0.22 | 0.06 | 0.06 |
| 165-220 | 9.22 | 1.94 | 2.63 | 0.55 | - | - | - | - | 9.22 | 1.94 | 2.63 | 0.55 |

TABLE S5: ACCUMULATED VOLUMES AND ACCUMULATION RATES
